# Supplementary material
Source: PubMed Central journal article supplement (PMC9233022)
Supplement: NIHMS1790810-supplement-Supp_materials.pdf [file NIHMS1790810-supplement-Supp_materials.pdf]

## **SUPPLEMENTARY MATERIALS**

*for the following Original Article in the Journal of American Academy of Dermatology:*

**Title:**       **Significant improvement of facial actinic keratoses after blue light photodynamic therapy with oral vitamin D pretreatment: An interventional cohort-controlled trial**

**Authors:**   Taylor A. Bullock, Jeffrey Negrey, Bo Hu, Christine B. Warren, Tayyaba Hasan, and Edward V. Maytin

**Supplem. Figure 1.** Side effect frequencies after PDT with or without neoadjuvant VD3

**Supplem. Table 1.** Patient demographics, Vitamin D levels, and AK lesion counts.

**Supplem. Table 2.** Scalp AK counts, with or without neoadjuvant VD3

**Supplem. Methods** Study eligibility, enrollment, and recruitment.

**Supplementary Figure 1.** Side effects after PDT, with or without Vitamin D pretreatment.

For each post-treatment side effect listed below, patients were asked whether they had experienced it (Yes or No) during the week immediately following PDT. Each bar represents the percentage of 29 patients in each Group who responded 'Yes' to that particular symptom or clinical sign.

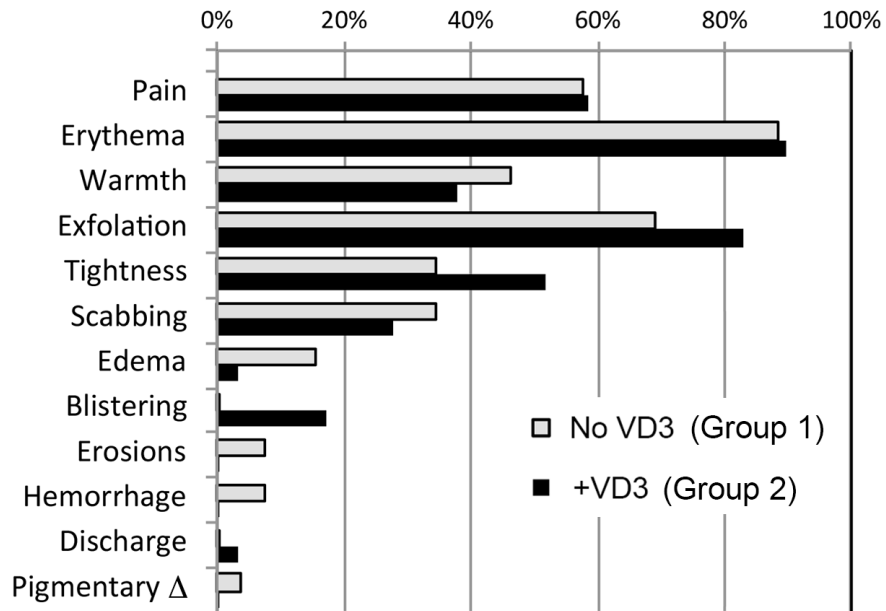

**SUPPLEMENTARY TABLE 1. Patient demographics, Vitamin D levels, and Actinic Keratosis Lesion Counts**

*Group 1: PDT alone (no additional VD3)*

*Group 2: PDT combined with neoadjuvant VD3*

| Subj. ID    | Age        | Sex | Baseline AK counts (Face) | Baseline AK counts (Scalp) | Time between Visits 1 and 2 (days) | Serum 25-OH D3 (mg/dL) | % Change in AK counts |                    |                           |
|-------------|------------|-----|---------------------------|----------------------------|------------------------------------|------------------------|-----------------------|--------------------|---------------------------|
|             |            |     |                           |                            |                                    |                        | %Δ AK counts Face     | %Δ AK counts Scalp | %Δ AK counts (Face+Scalp) |
| 86          | 79         | M   | 31                        | none                       | 77                                 | 14.9                   | -48.4%                | NA                 | -48.4%                    |
| 105         | 67         | F   | 21                        | none                       | 76                                 | 18.1                   | -66.7%                | NA                 | -66.7%                    |
| 49          | 65         | F   | 14                        | none                       | 98                                 | 25.3                   | -42.9%                | NA                 | -42.9%                    |
| 103         | 74         | F   | 13                        | 17                         | 102                                | 25.7                   | -23.1%                | -70.6%             | -46.8%                    |
| 39          | 80         | M   | 37                        | 121                        | 91                                 | 26.0                   | 19.0%                 | -81.8%             | -31.4%                    |
| 100         | 72         | M   | 18                        | none                       | 112                                | 29.1                   | -61.1%                | NA                 | -61.1%                    |
| 53          | 54         | M   | 25                        | none                       | 80                                 | 29.3                   | -44.0%                | NA                 | -44.0%                    |
| 110         | 76         | M   | none                      | 33                         | 90                                 | 32.0                   | NA                    | -63.6%             | -63.6%                    |
| 107         | 67         | M   | 4                         | 15                         | 118                                | 33.5                   | NA                    | -46.7%             | -46.7%                    |
| 65          | 73         | M   | none                      | 15                         | 182                                | 35                     | NA                    | -60.0%             | -60.0%                    |
| 95          | 64         | M   | 19                        | none                       | 91                                 | 35                     | -52.6%                | NA                 | -52.6%                    |
| 59          | 70         | M   | none                      | 79                         | 91                                 | 37.4                   | NA                    | -81.0%             | -81.0%                    |
| 99          | 76         | M   | 19                        | none                       | 161                                | 38.4                   | -78.9%                | NA                 | -78.9%                    |
| 94          | 77         | M   | 31                        | none                       | 147                                | 39.3                   | -67.7%                | NA                 | -67.7%                    |
| 69          | 74         | M   | 1                         | 62                         | 118                                | 41.7                   | NA                    | -82.3%             | -82.3%                    |
| 60          | 49         | M   | 8                         | 12                         | 90                                 | 41.8                   | NA                    | -41.7%             | -41.7%                    |
| 68          | 69         | M   | 3                         | 79                         | 175                                | 41.9                   | NA                    | -72.2%             | -72.2%                    |
| 24          | 73         | M   | 53                        | none                       | 84                                 | 42.7                   | -43.4%                | NA                 | -43.4%                    |
| 52          | 69         | M   | 62                        | 14                         | 101                                | 43.6                   | -74.2%                | 35.7%              | -19.2%                    |
| 108         | 79         | M   | 10                        | 56                         | 98                                 | 43.8                   | -50.0%                | -66.1%             | -58.0%                    |
| 93          | 67         | M   | 47                        | 30                         | 84                                 | 46.6                   | -80.9%                | -66.7%             | -73.8%                    |
| 88          | 57         | M   | none                      | 37                         | 137                                | 47.8                   | NA                    | -43.2%             | -43.2%                    |
| 106         | 63         | M   | 44                        | none                       | 102                                | 47.9                   | -47.7%                | NA                 | -47.7%                    |
| 101         | 74         | M   | 34                        | none                       | 105                                | 54.9                   | -67.6%                | NA                 | -67.6%                    |
| 56          | 85         | M   | 18                        | 67                         | 94                                 | 57.9                   | -88.9%                | -70.1%             | -79.5%                    |
| 111         | 80         | M   | 10                        | 21                         | 90                                 | 60.4                   | -60.0%                | -66.7%             | -64.5%                    |
| 50          | 80         | M   | 41                        | 18                         | 171                                | 61.1                   | -48.8%                | -44.4%             | -46.6%                    |
| 104         | 75         | M   | 45                        | none                       | 153                                | 61.5                   | -62.2%                | NA                 | -62.2%                    |
| 89          | 75         | M   | 53                        | 10                         | 101                                | 83.3                   | -52.8%                | -70.0%             | -61.4%                    |
| <b>71.1</b> | <b>90%</b> |     | <b>26.4</b>               | <b>40.4</b>                | <b>111</b>                         | <b>42.6</b>            | <b>-54.4%</b>         | <b>-58.3%</b>      | <b>-57.1%</b>             |
| 8.2         | male       |     | 17.5                      | 31.8                       | 31                                 | 14.9                   | 22.8%                 | 27.6%              | 15.5%                     |

n=21    n=17    n=29  
(n=7 deficient, n=22 normal serum 25-OH D3)

| Subj. ID    | Age        | Sex | Baseline AK counts (Face) | Baseline AK counts (Scalp) | Time between Visits 1 and 2 (days) | Serum 25-OH D3 (mg/dL) | % Change in AK counts |                    |                           |
|-------------|------------|-----|---------------------------|----------------------------|------------------------------------|------------------------|-----------------------|--------------------|---------------------------|
|             |            |     |                           |                            |                                    |                        | %Δ AK counts Face     | %Δ AK counts Scalp | %Δ AK counts (Face+Scalp) |
| 302         | 72         | M   | 47                        | 53                         | 157                                | 14.2                   | -70.2%                | -71.7%             | -71.0%                    |
| 326         | 69         | M   | 16                        | none                       | 122                                | 15.4                   | -75.0%                | NA                 | -75.0%                    |
| 323         | 81         | M   | 48                        | 2                          | 91                                 | 20.4                   | -72.9%                | NA                 | -72.9%                    |
| 303         | 55         | M   | 19                        | none                       | 196                                | 22.5                   | -78.9%                | NA                 | -78.9%                    |
| 311         | 68         | M   | 57                        | none                       | 136                                | 22.9                   | -66.7%                | NA                 | -66.7%                    |
| 312         | 58         | M   | 12                        | 17                         | 123                                | 26.4                   | -66.7%                | -41.2%             | -53.9%                    |
| 324         | 82         | M   | 30                        | 18                         | 116                                | 28.1                   | -76.7%                | -77.8%             | -77.2%                    |
| 317         | 74         | M   | 77                        | none                       | 98                                 | 28.7                   | -61.0%                | NA                 | -61.0%                    |
| 331         | 60         | M   | 72                        | 7                          | 105                                | 31                     | -69.4%                | NA                 | -69.4%                    |
| 328         | 69         | M   | 19                        | 25                         | 112                                | 32.2                   | -89.5%                | -44.0%             | -66.7%                    |
| 333         | 86         | M   | 17                        | 60                         | 98                                 | 33                     | -88.2%                | -56.7%             | -72.5%                    |
| 319         | 75         | M   | none                      | 30                         | 95                                 | 33.8                   | NA                    | -33.3%             | -33.3%                    |
| 322         | 77         | M   | 51                        | none                       | 137                                | 35.2                   | -23.5%                | NA                 | -23.5%                    |
| 329         | 64         | F   | 34                        | none                       | 102                                | 36                     | -82.4%                | NA                 | -82.4%                    |
| 306         | 53         | M   | 32                        | 27                         | 161                                | 36.8                   | -71.9%                | -63.0%             | -67.4%                    |
| 316         | 73         | M   | 16                        | none                       | 102                                | 37.3                   | -75.0%                | NA                 | -75.0%                    |
| 320         | 92         | M   | 6                         | 31                         | 95                                 | 37.7                   | NA                    | -64.5%             | -64.5%                    |
| 309         | 76         | M   | 72                        | 13                         | 147                                | 41                     | -73.6%                | -76.9%             | -75.3%                    |
| 332         | 73         | M   | 15                        | none                       | 94                                 | 41.3                   | -73.3%                | NA                 | -73.3%                    |
| 310         | 72         | M   | 20                        | none                       | 165                                | 42.2                   | -60.0%                | NA                 | -60.0%                    |
| 308         | 75         | M   | 49                        | none                       | 91                                 | 43.3                   | -75.5%                | NA                 | -75.5%                    |
| 313         | 68         | M   | 26                        | none                       | 116                                | 45.3                   | -84.6%                | NA                 | -84.6%                    |
| 318         | 71         | F   | 16                        | none                       | 144                                | 46.8                   | -50.0%                | NA                 | -50.0%                    |
| 307         | 67         | M   | 12                        | 38                         | 154                                | 50.2                   | -91.7%                | -84.2%             | -87.9%                    |
| 315         | 75         | M   | 25                        | none                       | 133                                | 50.7                   | -84.0%                | NA                 | -84.0%                    |
| 327         | 67         | M   | 61                        | 9                          | 88                                 | 56.1                   | -68.9%                | NA                 | -68.9%                    |
| 334         | 70         | M   | 18                        | 75                         | 161                                | 61.7                   | -66.7%                | -40.0%             | -53.3%                    |
| 330         | 66         | M   | 25                        | none                       | 91                                 | 69.4                   | -84.0%                | NA                 | -84.0%                    |
| 301         | 76         | M   | 54                        | 35                         | 165                                | 100                    | -75.9%                | -68.6%             | -72.2%                    |
| <b>71.2</b> | <b>93%</b> |     | <b>33.8</b>               | <b>29.3</b>                | <b>124</b>                         | <b>39.3</b>            | <b>-72.5%</b>         | <b>-60.2%</b>      | <b>-68.3%</b>             |
| 8.5         | male       |     | 20.9                      | 20.6                       | 30                                 | 17.4                   | 13.6%                 | 17.0%              | 14.6%                     |

n=27    n=12    n=29  
(n=8 deficient, n=21 normal serum 25-OH D3)

FOOTNOTE: All patients were either Fitzpatrick skin type 1 or 2

**SUPPLEMENTARY TABLE 2**

**Scalp AK clearance rates after PDT with or without oral Vitamin D pretreatment**

|                                                                              | <b>Group 1</b><br>(PDT only) | <b>Group 2</b><br>(VD3 + PDT) |
|------------------------------------------------------------------------------|------------------------------|-------------------------------|
| <b>VitD deficient</b> (< 31 mg/dL)                                           |                              |                               |
| No. of patients (n)                                                          | 2                            | 3                             |
| 25OH-D3 values (mg/dL), range                                                | 14.9 to 29.3                 | 14.2 to 28.7                  |
| AK clearance (% , mean ± SD)                                                 | <b>76.2 ± 7.9</b>            | <b>63.6 ± 19.6</b>            |
| <b>VitD replete</b> (> 31 mg/dL)                                             |                              |                               |
| No. of patients (n)                                                          | 15                           | 9                             |
| 25OH-D3 values (mg/dL), range                                                | 32.0 to 83.3                 | 31.0 to 100                   |
| AK clearance (% , mean ± SD)                                                 | <b>55.9 ± 28.5</b>           | <b>59.0 ± 17.1</b>            |
| <i>Are the VitD deficient and replete groups statistically different? **</i> | <i>No, p = 0.47 *</i>        | <i>No, p = 0.77 *</i>         |
| <b>All patients</b>                                                          |                              |                               |
| AK clearance (% , mean ± SD)                                                 | <b>58.3 ± 27.6</b>           | <b>60.2 ± 17.0</b>            |
| <i>Statistical comparison between Group 1 and 2, by Student t-test:</i>      | -----                        | <i>p = 0.84 *</i>             |

\*These P values are not significant.

**Supplementary Methods.** *Details of study eligibility, enrollment, and recruitment.*

To be eligible, patients needed to be 18 years or older and have 10 or more Grade 1 or 2 AKs on the face or the scalp (Grade 1: slightly palpable, better felt than seen; Grade 2: moderately thick, easily seen and felt). Pregnant females were excluded. For patients in the VDAK study in particular, any condition associated with an elevated risk for hypercalcemia (e.g., renal disease) was reason for exclusion.

The study was limited to the face and scalp because blue light PDT was only approved for those two body sites at the time the study began. Patients enrolled in the study had already been considered medically appropriate to receive PDT by their referring dermatologists, i.e., no history of porphyria, photosensitization, or recent tetracycline or retinoid use. To reflect real-world conditions, we did not exclude patients who had previously had non-melanoma skin cancers on the face or scalp, or those who had received AK treatments at least twice within the previous 2 years.

For any patient with grade 3 AKs in the treatment area, the particular lesion was carefully noted on photographs and excluded from the analysis.
